# Supplementary material for: An efficient pyrrolysyl-tRNA synthetase for economical production of MeHis-containing enzymes
Source: Royal Society of Chemistry journal article supplement (doi:10.1039/d4fd00019f), 2024-01-01
Supplement: d4fd00019f1.pdf [file d4fd00019f1.pdf]

Supplementary Information

**An Efficient Pyrrolysyl-tRNA Synthetase for Economical Production of MeHis-containing Enzymes**

Amy E. Hutton<sup>1†</sup>, Jake Foster<sup>1†</sup>, James E.J. Sanders<sup>1</sup>, Christopher J. Taylor<sup>1</sup>, Stefan A. Hoffmann<sup>1</sup>,  
Yizhi Cai<sup>1</sup>, Sarah L. Lovelock<sup>1\*</sup>, Anthony P. Green<sup>1\*</sup>

Manchester Institute of Biotechnology, School of Chemistry, The University of Manchester,  
Manchester, UK.

\*Corresponding author: [Anthony.green@manchester.ac.uk](mailto:Anthony.green@manchester.ac.uk)

**Table of Contents**

GFP expression data.....3  
Mass Spectrometry data.....5

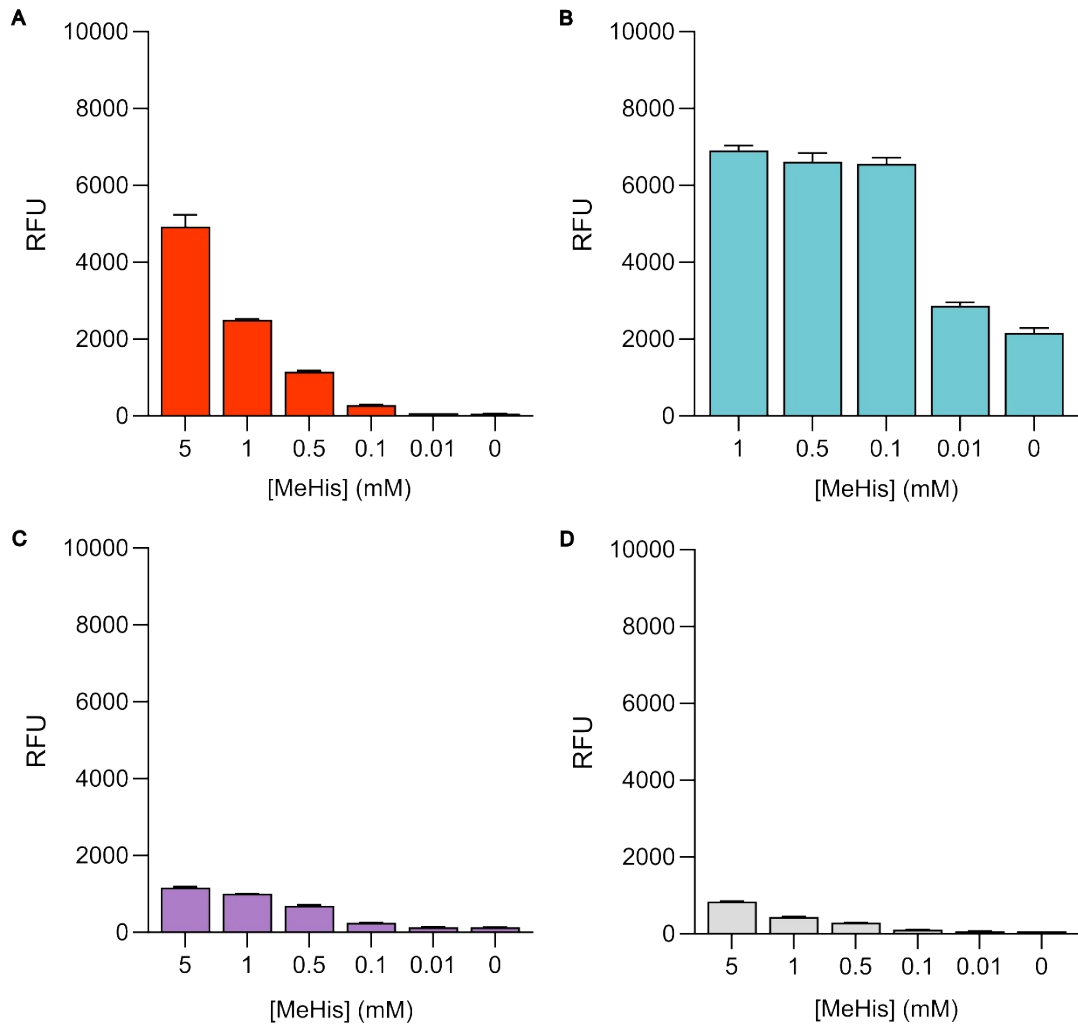

Supplementary Figure 1: Bar charts showing GFP production containing MeHis at position 150 in cultures with varying MeHis concentrations (0-5 mM), using either **A**) *MaPyIRS*<sup>MIFAF</sup>; **B**) *G1PyIRS*<sup>IFGFF</sup>; **C**) *RumEnPyIRS*<sup>IFGFF</sup>; **D**) *RumEnPyIRS*<sup>MIFAF</sup>. Error bars represent the standard deviation of measurements made in triplicate.

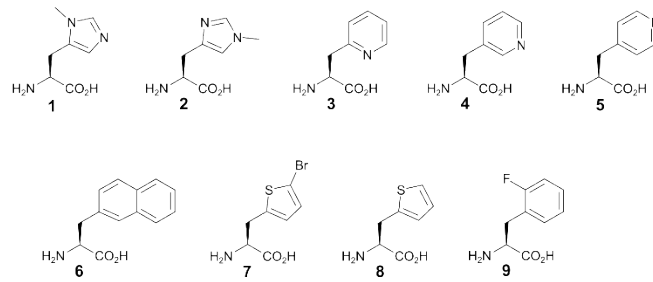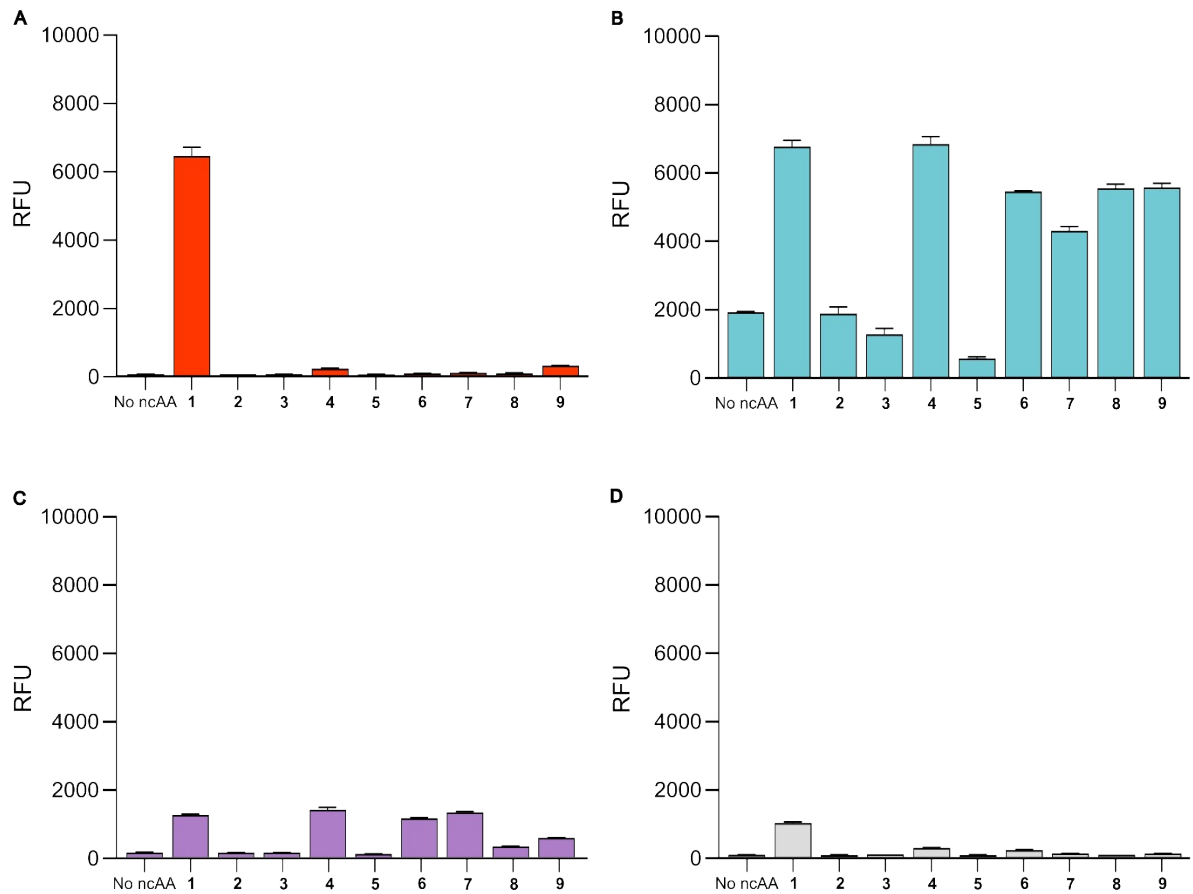

Supplementary Figure 2: Bar charts showing the activities of **A)** *MaPyIRS*<sup>MIFAF</sup>; **B)** *G1PyIRS*<sup>IFGFF</sup>; **C)** *RumEnPyIRS*<sup>IFGFF</sup>; **D)** *RumEnPyIRS*<sup>MIFAF</sup>, towards a small panel of ncAAs (10 mM, 1-9) for the production of GFP through the suppression of the UAG codon at position 150. Error bars represent the standard deviation of measurements made in triplicate.

**Table S1:** Mass spectrometry of GFP variants.

|    | PyIRS                              | ncAA used | GFP construct                   | Predicted | Observed           |
|----|------------------------------------|-----------|---------------------------------|-----------|--------------------|
| 1  | <i>G1PyIRS</i> <sup>IFGFF</sup>    | MeHis     | GFP 150UAG (6His-tagged)        | 27864     | 27864              |
| 2  | <i>G1PyIRS</i> <sup>MIFAF</sup>    | MeHis     | GFP 150UAG (6His-tagged)        | 27864     | 27864              |
| 3  | <i>RumEnPyIRS</i> <sup>IFGFF</sup> | MeHis     | GFP 150UAG (6His-tagged)        | 27864     | 27864              |
| 4  | <i>RumEnPyIRS</i> <sup>MIFAF</sup> | MeHis     | GFP 150UAG (6His-tagged)        | 27864     | 27864              |
| 5  | <i>G1PyIRS</i> <sup>IFGFF</sup>    | No ncAA   | GFP 150UAG (6His-tagged)        | -         | 27860 <sup>a</sup> |
| 6  | <i>G1PyIRS</i> <sup>MIFAF</sup>    | MeHis     | GFP 40 and 150UAG (6His-tagged) | 27901     | 27901              |
| 7  | <i>G1PyIRS</i> <sup>MIFAF</sup>    | <b>4</b>  | GFP 150UAG (6His-tagged)        | 27861     | 27861              |
| 8  | <i>G1PyIRS</i> <sup>MIFAF</sup>    | <b>6</b>  | GFP 150UAG (6His-tagged)        | 27946     | 27946              |
| 9  | <i>G1PyIRS</i> <sup>MIFAF</sup>    | <b>7</b>  | GFP 150UAG (6His-tagged)        | 27945     | 27945              |
| 10 | <i>G1PyIRS</i> <sup>MIFAF</sup>    | <b>8</b>  | GFP 150UAG (6His-tagged)        | 27866     | 27866              |

<sup>a</sup> observed mass corresponds to incorporation of phenylalanine.
